# Supplementary material
Source: PubMed Central journal article supplement (PMC6207135)
Supplement: AnnalsATS.201708-687OC_putcha_data_supplement.pdf [file AnnalsATS.201708-687OC_putcha_data_supplement.pdf]

**Title:** The contribution of anemia to adverse outcomes in a COPD population with high burden of comorbidities, an analysis from SPIROMICS.

**Authors:** Nirupama Putcha, Ashraf Fawzy, Gabriel G. Paul, Allison A. Lambert, Kevin J. Psoter, Venkataramana K. Sidhaye, J. Michael Wells, Wassim W. Labaki, Claire Doerschuk, Richard E. Kanner, MeiLan K. Han, Carlos Martinez, Laura M. Paulin, Fernando J. Martinez, Robert A. Wise, Wanda K. O’Neal, R. Graham Barr, Nadia N. Hansel for the SPIROMICS investigators.

**Online Supplementary Information:**

| <b>e-Table 1: Associations of hemoglobin with outcomes (continuous), among those with normocytic anemia and normal hemoglobin.</b>  |                    |                          |                  |
|-------------------------------------------------------------------------------------------------------------------------------------|--------------------|--------------------------|------------------|
|                                                                                                                                     | <b>Coefficient</b> | <b>95 % CI</b>           | <b>p-value</b>   |
| <b>Clinical measures</b>                                                                                                            |                    |                          |                  |
| <b>6MWD</b>                                                                                                                         | <b>11.36</b>       | <b>(6.05, 16.68)</b>     | <b>&lt;0.001</b> |
| <b>FEV1 % pred</b>                                                                                                                  | <b>1.67</b>        | <b>(0.35, 0.66)</b>      | <b>0.001</b>     |
| <b>SGRQ</b>                                                                                                                         | <b>-0.69</b>       | <b>(-1.34, -0.043)</b>   | <b>0.037</b>     |
| <b>Total CAT</b>                                                                                                                    | <b>-0.29</b>       | <b>(-0.58, -0.0062)</b>  | <b>0.045</b>     |
| # exac in past yr                                                                                                                   | -0.017             | (-0.057, 0.023)          | 0.406            |
| <b># severe exac in past yr</b>                                                                                                     | <b>-0.038</b>      | <b>(-0.067, -0.0096)</b> | <b>0.009</b>     |
| <b>MMRC</b>                                                                                                                         | <b>-0.069</b>      | <b>(-0.11, -0.031)</b>   | <b>&lt;0.001</b> |
| <b>Pre-walk oxygen saturation</b>                                                                                                   | <b>-0.30</b>       | <b>(-0.48, -0.12)</b>    | <b>0.001</b>     |
| <b>Post-walk oxygen saturation</b>                                                                                                  | <b>-0.42</b>       | <b>(-0.63, -0.20)</b>    | <b>&lt;0.001</b> |
| Exacerbations over follow-up (IRR)                                                                                                  | 0.98               | (0.91, 1.04)             | 0.469            |
| Severe exacerbations over follow-up (IRR)                                                                                           | 0.99               | (0.89, 1.11)             | 0.911            |
| All regression models adjusted for age, gender, race, FEV1 % predicted, current smoking status, education level, comorbidity count. |                    |                          |                  |

| <b>e-Table 2: Differences in biomarker levels between those with and without normocytic anemia</b> |                   |                          |                  |                  |                          |                  |
|----------------------------------------------------------------------------------------------------|-------------------|--------------------------|------------------|------------------|--------------------------|------------------|
|                                                                                                    | <b>Unadjusted</b> |                          |                  | <b>Adjusted*</b> |                          |                  |
|                                                                                                    | $\beta$           | 95% CI                   | p-value          | $\beta$          | 95% CI                   | p-value          |
| VWF                                                                                                | 12.69             | (0.86, 24.53)            | 0.036            | 6.83             | (-4.56, 18.21)           | 0.240            |
| VEGF $\alpha$                                                                                      | -11.45            | (-43.76, 20.86)          | 0.487            | -16.3            | (-50.5, 17.91)           | 0.350            |
| TNF $\alpha$                                                                                       | -1.05             | (-7.00, 4.90)            | 0.730            | -1.03            | (-7.34, 5.28)            | 0.749            |
| IL-15                                                                                              | 0.059             | (-0.027, 0.14)           | 0.177            | 0.055            | (-0.035, 0.15)           | 0.228            |
| IFN $\gamma$                                                                                       | -0.12             | (-0.55, 0.31)            | 0.571            | -0.016           | (-0.47, 0.44)            | 0.943            |
| IgA                                                                                                | 0.34              | (-0.014, 0.69)           | 0.060            | 0.21             | (-0.14, 0.56)            | 0.236            |
| <b>CRP</b>                                                                                         | <b>7.50</b>       | <b>(5.01, 9.98)</b>      | <b>&lt;0.001</b> | <b>6.97</b>      | <b>(4.35, 9.58)</b>      | <b>&lt;0.001</b> |
| APOa4                                                                                              | 0.72              | (-0.48, 1.93)            | 0.240            | 0.70             | (-0.57, 1.96)            | 0.280            |
| <b>sRAGE/AGER</b>                                                                                  | <b>0.96</b>       | <b>(0.39, 1.53)</b>      | <b>0.001</b>     | <b>1.35</b>      | <b>(0.78, 1.93)</b>      | <b>&lt;0.001</b> |
| VCAM1                                                                                              | 20.35             | (-26.77, 67.48)          | 0.397            | 20.09            | (-22.74, 62.92)          | 0.358            |
| SOD1                                                                                               | -4.92             | (-9.82, -0.027)          | 0.049            | -3.64            | (-8.80, 1.53)            | 0.167            |
| SHBG                                                                                               | 0.41              | (-8.19, 9.01)            | 0.926            | 1.14             | (-6.87, 9.14)            | 0.780            |
| <b>CDH1</b>                                                                                        | <b>1312.19</b>    | <b>(940.55, 1683.82)</b> | <b>&lt;0.001</b> | <b>1213.20</b>   | <b>(832.85, 1593.55)</b> | <b>&lt;0.001</b> |

Multivariable linear regression analysis included adjustment for age, gender, race, FEV1 % predicted, current smoking status, educational attainment, comorbidity count, and batch number. A P value of 0.00384 was considered statistically significant after correction for multiple comparisons.

**e-Table 3: Interactions between normocytic anemia and cardiometabolic phenotype. Coefficients indicate difference between those with normocytic anemia and those without, in subgroups with and without cardiometabolic phenotype.**

|              | Not cardiometabolic phenotype |                          |                  | Cardiometabolic phenotype |                           |                  | p-int |
|--------------|-------------------------------|--------------------------|------------------|---------------------------|---------------------------|------------------|-------|
|              | $\beta$                       | 95% CI                   | p-value          | $\beta$                   | 95% CI                    | p-value          |       |
| IL-15        | -0.032                        | (-0.17, 0.10)            | 0.642            | <b>0.12</b>               | <b>(0.021, 0.21)</b>      | <b>0.017</b>     | 0.050 |
| <u>sRAGE</u> | 0.55                          | (-0.21, 1.31)            | 0.156            | <b>2.36</b>               | <b>(1.55, 3.18)</b>       | <b>&lt;0.001</b> | 0.001 |
| ApoA4        | -0.21                         | (-1.92, 1.51)            | 0.812            | <b>2.00</b>               | <b>(0.18, 3.83)</b>       | <b>0.032</b>     | 0.079 |
| CDH-1        | <b>763.28</b>                 | <b>(335.17, 1191.39)</b> | <b>&lt;0.001</b> | <b>1767.53</b>            | <b>(1087.34, 2447.72)</b> | <b>&lt;0.001</b> | 0.018 |

Adjusted for age, gender, race, FEV1 % predicted, current smoking status, educational attainment and batch number.
